# Supplementary material for: Investigating cross-organism prediction of prokaryotic essential proteins using unsupervised language model and ensemble strategy
Source: Research Square preprint supplement (doi:10.21203/rs.3.rs-4469595/v1), 2024-06-06
Supplement: Supplementary file 1 [file 40044d3d79afa1c5f8b6d248.xlsx]

## Sheet: iqr
DEG_id	IQR
DEG1002	0.108497
DEG1062	0.103628
DEG1065	0.103466
DEG1061	0.102886
DEG1064	0.0971924
DEG1063	0.094922
DEG1059	0.0931658
DEG1012	0.0909147
DEG1052	0.0893735
DEG1047	0.0892109
DEG1001	0.0889516
DEG1054	0.0821614
DEG1038	0.0816653
DEG1026	0.0816584
DEG1017	0.0815595
DEG1021	0.0812467
DEG1051	0.0809662
DEG1049	0.0799332
DEG1042	0.0796859
DEG1029	0.078543
DEG1015	0.076068
DEG1037	0.0759753
DEG1003	0.0742398
DEG1013	0.0723854
DEG1019	0.0720908
DEG1046	0.0708181
DEG1041	0.0702652
DEG1043	0.0702114
DEG1028	0.0679732
DEG1024	0.0676957
DEG1010	0.067677
DEG1036	0.0660913
DEG1016	0.0657107
DEG1025	0.064039
DEG1067	0.0639969
DEG1022	0.0635291
DEG1060	0.0633997
DEG1027	0.0633649
DEG1007	0.063157
DEG1045	0.0631528
DEG1033	0.0630968
DEG1057	0.0627358
DEG1039	0.0624868
DEG1020	0.0612387
DEG1055	0.060082
DEG1066	0.0592886
DEG1018	0.0592851
DEG1030	0.0583375
DEG1011	0.057302
DEG1044	0.0571937
DEG1056	0.0562318
DEG1032	0.0558868
DEG1023	0.0551638
DEG1034	0.0548117
DEG1008	0.0535943
DEG1048	0.0535439
DEG1050	0.0503368
DEG1053	0.0501284
DEG1035	0.0496742
DEG1031	0.0465301
DEG1058	0.0392015
DEG1005	0.0214096
