# Supplementary material for: Investigating cross-organism prediction of prokaryotic essential proteins using unsupervised language model and ensemble strategy
Source: Research Square preprint supplement (doi:10.21203/rs.3.rs-4469595/v1), 2024-06-06
Supplement: Supplementary file 2 [file 49e241552d6d8d0a4bebe9f3.xlsx]

## Sheet: Sheet1
DEG_id	accuracy	precision	recall	F1	auroc
DEG1001	0.8	0.735461	0.937037	0.823764	0.921811
DEG1002	0.768333	0.700685	0.936667	0.801629	0.889444
DEG1003	0.592593	0.588126	0.616667	0.601909	0.641015
DEG1005	0.51157	0.509007	0.629752	0.562867	0.550741
DEG1006	0.7	0.666667	0.8	0.727273	0.7936
DEG1007	0.735556	0.699938	0.822222	0.755779	0.804444
DEG1008	0.589655	0.601696	0.534483	0.564725	0.645482
DEG1010	0.707438	0.763724	0.6	0.671631	0.777174
DEG1011	0.611364	0.614013	0.586364	0.59852	0.700723
DEG1012	0.698701	0.658381	0.825974	0.732585	0.775409
DEG1013	0.776042	0.760195	0.80625	0.782505	0.839106
DEG1014	0.783333	0.75744	0.833333	0.792935	0.851111
DEG1015	0.713636	0.739634	0.657576	0.695614	0.736364
DEG1016	0.8	0.744215	0.914286	0.820347	0.876041
DEG1017	0.784286	0.740853	0.874286	0.801876	0.875102
DEG1018	0.621667	0.631114	0.585	0.607028	0.680583
DEG1019	0.80339	0.764211	0.877966	0.816844	0.895892
DEG1020	0.798947	0.766951	0.858947	0.8101	0.85631
DEG1021	0.771429	0.703571	0.938095	0.804082	0.900454
DEG1022	0.762921	0.752118	0.78427	0.767791	0.829718
DEG1023	0.709677	0.70891	0.706452	0.706445	0.773621
DEG1024	0.831579	0.824698	0.842105	0.832939	0.904848
DEG1025	0.707792	0.801638	0.551948	0.65325	0.805549
DEG1026	0.7	0.748497	0.6	0.665052	0.8105
DEG1027	0.662044	0.732043	0.510949	0.601584	0.760009
DEG1028	0.762136	0.806663	0.68932	0.742823	0.813328
DEG1029	0.8	0.752094	0.895	0.817263	0.886719
DEG1030	0.6	0.614902	0.504348	0.551542	0.643478
DEG1031	0.615556	0.600718	0.684444	0.639285	0.693432
DEG1032	0.792754	0.774398	0.826087	0.799252	0.864314
DEG1033	0.835211	0.788688	0.915493	0.847216	0.935806
DEG1034	0.682979	0.687821	0.665957	0.676042	0.717836
DEG1035	0.675269	0.733301	0.548387	0.62656	0.729795
DEG1036	0.862687	0.840519	0.895522	0.867073	0.928937
DEG1037	0.724444	0.66765	0.893333	0.764107	0.80079
DEG1038	0.719565	0.669733	0.865217	0.75493	0.806238
DEG1039	0.670909	0.634567	0.803636	0.709012	0.766612
DEG1040	0.714394	0.784312	0.592424	0.674655	0.813958
DEG1041	0.793519	0.774556	0.827778	0.799986	0.862294
DEG1042	0.738333	0.683732	0.886667	0.772032	0.870778
DEG1043	0.768539	0.769478	0.766292	0.767691	0.802373
DEG1044	0.746667	0.780209	0.686667	0.729523	0.802667
DEG1045	0.762712	0.71098	0.884746	0.788234	0.883826
DEG1046	0.798734	0.769366	0.853165	0.808757	0.897356
DEG1047	0.547917	0.558916	0.433333	0.487344	0.553255
DEG1048	0.813559	0.784733	0.864407	0.822288	0.915656
DEG1049	0.551515	0.537937	0.70303	0.608697	0.600551
DEG1050	0.602667	0.583995	0.709333	0.640399	0.673742
DEG1051	0.845872	0.844648	0.847706	0.846071	0.90787
DEG1052	0.743333	0.696358	0.862222	0.77034	0.837802
DEG1053	0.770103	0.829101	0.680412	0.747309	0.824636
DEG1054	0.712821	0.651748	0.912821	0.760363	0.818935
DEG1055	0.639024	0.63785	0.642276	0.639816	0.708018
DEG1056	0.574519	0.601215	0.441346	0.508898	0.582077
DEG1057	0.79881	0.872371	0.7	0.776489	0.848866
DEG1058	0.576056	0.572517	0.6	0.585836	0.61591
DEG1059	0.773913	0.776179	0.769565	0.772469	0.887996
DEG1060	0.65	0.648053	0.653333	0.649996	0.688025
DEG1061	0.810714	0.749605	0.932143	0.830684	0.90236
DEG1062	0.839655	0.793966	0.917241	0.850919	0.909215
DEG1063	0.772549	0.706313	0.933333	0.804062	0.866205
DEG1064	0.796721	0.726842	0.95082	0.823607	0.898199
DEG1065	0.747458	0.681537	0.928814	0.786158	0.832577
DEG1066	0.797333	0.80498	0.784	0.793885	0.826702
DEG1067	0.766154	0.709453	0.901538	0.793991	0.884592
DEG1068	0.810606	0.780822	0.863636	0.820144	0.869146
