# Supplementary material for: Investigating cross-organism prediction of prokaryotic essential proteins using unsupervised language model and ensemble strategy
Source: Research Square preprint supplement (doi:10.21203/rs.3.rs-4469595/v1), 2024-06-06
Supplement: Supplementary file 3 [file bba493a8cc68944dc3adfa3d.xlsx]

## Sheet: result_table
DEG	Species	Essential	Non-essential	Reference genome
DEG1001	Bacillus subtilis 168	271	3967	['NC_000964.3']
DEG1002	Staphylococcus aureus N315	301	2296	['NC_002745.2']
DEG1003	Vibrio cholerae N16961	559	2935	['NC_002505.1' 'NC_002506.1']
DEG1005	Haemophilus influenzae Rd KW20	608	989	['NC_000907.1']
DEG1006	Mycoplasma genitalium G37	377	127	['NC_000908.2']
DEG1007	Streptococcus pneumoniae	232	2968	['NC_003028.3' 'NC_003098.1']
DEG1008	Helicobacter pylori 26695	291	1138	['NC_000915.1']
DEG1010	Mycobacterium tuberculosis H37Rv	614	3307	['NC_000962.3']
DEG1011	Salmonella typhimurium LT2	230	4232	['NC_003197.2']
DEG1012	Francisella novicida U112	388	1378	['NC_008601.1']
DEG1013	Acinetobacter baylyi ADP1	484	2716	['NC_005966.1']
DEG1014	Mycoplasma pulmonis UAB CTIP	301	449	['NC_002771.1']
DEG1015	Pseudomonas aeruginosa UCBPP-PA14	333	5548	['NC_008463.1']
DEG1016	Salmonella enterica serovar Typhi	350	3909	['NC_004631.1']
DEG1017	Staphylococcus aureus NCTC 8325	351	2422	['NC_007795.1']
DEG1018	Escherichia coli MG1655 I	609	3690	['NC_000913.3']
DEG1019	Escherichia coli MG1655 II	296	4003	['NC_000913.3']
DEG1020	Caulobacter crescentus	480	3484	['NC_011916.1']
DEG1021	Streptococcus sanguinis	213	2024	['NC_009009.1']
DEG1022	Porphyromonas gingivalis ATCC 33277	448	1440	['NC_010729.1']
DEG1023	Bacteroides thetaiotaomicron VPI-5482	312	4311	['NC_004663.1']
DEG1024	Burkholderia thailandensis E264	381	5221	['NC_007651.1' 'NC_007650.1']
DEG1025	Mycobacterium tuberculosis H37Rv II	771	3137	['NC_000962.3']
DEG1026	Salmonella enterica subsp. enterica serovar Typhimurium str. 14028S	103	4357	['NC_016856.1']
DEG1027	Mycobacterium tuberculosis H37Rv III	685	3223	['NC_000962.3']
DEG1028	Sphingomonas wittichii RW1	520	4409	['NC_009511.1']
DEG1029	Shewanella oneidensis MR-1	401	3732	['NC_004347.2']
DEG1030	Pseudomonas aeruginosa PAO1	117	5456	['NC_002516.2']
DEG1031	Campylobacter jejuni subsp. jejuni NCTC 11168 = ATCC 700819	228	1350	['NC_002163.1']
DEG1032	Salmonella enterica serovar Typhimurium SL1344	350	4148	['NC_016810.1']
DEG1033	Salmonella enterica serovar Typhi Ty2	356	3903	['NC_004631.1']
DEG1034	Bacteroides fragilis 638R	476	3751	['NC_016776.1']
DEG1035	Burkholderia pseudomallei K96243	473	5674	['NC_006350.1' 'NC_006351.1']
DEG1036	Pseudomonas aeruginosa PAO1	336	5236	['NC_002516.2']
DEG1037	Streptococcus pyogenes MGAS5448	225	1479	['NC_007297.2']
DEG1038	Streptococcus pyogenes NZ131	234	1381	['NC_011375.1']
DEG1039	Porphyromonas gingivalis ATCC 33277	277	1611	['NC_010729.1']
DEG1040	Synechococcus elongatus PCC 7942	661	2042	['NC_007604.1' 'NC_007595.1']
DEG1041	Rhodopseudomonas palustris CGA009	544	4371	['NC_005296.1']
DEG1042	Streptococcus agalactiae A909	309	1711	['NC_007432.1']
DEG1043	Acinetobacter baumannii ATCC 17978	451	2899	['NC_009085.1']
DEG1044	Acinetobacter baumannii ATCC 17978	154	3196	['NC_009085.1']
DEG1045	Agrobacterium fabrum str. C58	298	2404	['NC_003062.2']
DEG1046	Brevundimonas subvibrioides ATCC 15264	412	2943	['NC_014375.1']
DEG1047	Bacillus thuringiensis BMB171	493	4901	['NC_014171.1' 'NC_014172.1']
DEG1048	Escherichia coli ST131 strain EC958	300	4657	['HG941718.1']
DEG1049	Campylobacter jejuni subsp. jejuni NCTC 11168 = ATCC 700819	166	1406	['NC_002163.1']
DEG1050	Campylobacter jejuni subsp. jejuni 81-176	376	1170	['NC_008787.1']
DEG1051	Pseudomonas aeruginosa PAO1	549	5021	['AE004091.2']
DEG1052	Francisella tularensis Schu S4	453	1605	['AJ749949.2']
DEG1053	Burkholderia cenocepacia K56-2	495	6388	['NZ_LAUA01000001.1' 'NZ_LAUA01000002.1' 'NZ_LAUA01000014.1' 'NZ_LAUA01000003.1' 'NZ_LAUA01000004.1' 'NZ_LAUA01000007.1' 'NZ_LAUA01000009.1' 'NZ_LAUA01000016.1' 'NZ_LAUA01000017.1']
DEG1054	Streptococcus mutans UA159	197	1765	['AE014133.2']
DEG1055	Neisseria gonorrhoeae MS11	628	1433	['NC_022240.1']
DEG1056	Escherichia coli O157:H7	1064	4009	['NZ_CP008957.1' 'NZ_CP008958.1']
DEG1057	Ralstonia solanacearum GMI1000	445	4524	['NC_003295.1' 'NC_003296.1']
DEG1058	Streptococcus suis	357	1468	['AM946016.1']
DEG1059	Mycobacterium avium subsp. hominissuis strain MAC109	230	4457	['CP029332.1']
DEG1060	Providencia stuartii strain BE2467	469	7485	['CP017054.1' 'NZ_CP017054.1' 'NZ_CP017055.1' 'NZ_CP017056.1']
DEG1061	Staphylococcus aureus subsp. aureus NCTC 8325	284	2483	['NC_007795.1']
DEG1062	Staphylococcus aureus subsp. aureus USA300_TCH1516	295	2443	['NC_010079.1']
DEG1063	Staphylococcus aureus subsp. aureus MW2	256	2393	['NC_003923.1']
DEG1064	Staphylococcus aureus subsp. aureus MSSA476	305	2320	['NC_002953.3']
DEG1065	Staphylococcus aureus subsp. aureus MRSA252	295	2385	['NC_002952.2']
DEG1066	Burkholderia cenocepacia J2315	381	6738	['AM747720.1' 'AM747721.1' 'AM747722.1' 'AM747723.1']
DEG1067	Vibrio cholerae C6706	328	3167	['NC_002505.1' 'NC_002506.1']
DEG1068	Mycoplasma pneumoniae	331	356	['NC_000912.1']
